# Supplementary material for: Formation of a pillar[5]arene-based [3]pseudorotaxane in solution and in the solid state
Source: Royal Society of Chemistry journal article supplement (doi:10.1039/c2cc37646f), 2012-11-20
Supplement: c2cc37646f.pdf [file c2cc37646f.pdf]

## Formation of a pillar[5]arene-based [3]pseudorotaxane in solution and in the solid state

Lingyan Gao, Chengyou Han, Bo Zheng, Shengyi Dong and Feihe Huang\*

*Department of Chemistry, Zhejiang University, Hangzhou 310027, P. R. China*

*Fax: +86-571-8795-1895; Tel: +86-571-8795-3189; Email address: [fhuang@zju.edu.cn](mailto:fhuang@zju.edu.cn).*

### Electronic Supplementary Information (10 pages)

|   |                                                                                                         |     |
|---|---------------------------------------------------------------------------------------------------------|-----|
| 1 | <i>Materials and methods</i>                                                                            | S2  |
| 2 | <i>Syntheses of 3 and 4</i>                                                                             | S2  |
| 3 | <i>Stoichiometry and association constant determination for the complexation between 2 and 3</i>        | S6  |
| 4 | <i>The <sup>1</sup>H NMR of a solution of 2 and 3 in different organic solvents</i>                     | S9  |
| 5 | <i>Variable-temperature <sup>1</sup>H NMR spectra of a solution of 2 and 3 in toluene-d<sub>8</sub></i> | S10 |
| 6 | <i>X-ray crystal data of 4</i>                                                                          | S10 |
|   | <i>References</i>                                                                                       | S10 |

### 1. Materials and methods

All reagents were commercially available and used as supplied without further purification. 1,4-Dipropoxybenzene **1** and 1,4-bis(4-bromobutoxy)benzene **2** were synthesized according to literature procedures.<sup>S1</sup> <sup>1</sup>H NMR spectra were collected on a temperature-controlled 400 MHz or 500 MHz spectrometer. <sup>13</sup>C NMR spectra were recorded on a Bruker AVANCE DMX-500 spectrometer at 125 MHz. Low-resolution electrospray ionization (LRESI) mass spectra were obtained on a Bruker Esquire 3000 plus mass spectrometer (Bruker-Franzen Analytik GmbH Bremen, Germany) equipped with a ESI interface and an ion trap analyzer.

### 2. Syntheses of **3** and **4**

A mixture of 1,4-dipropoxybenzene (4.40 g, 26.3 mmol), 1,4-bis(4-bromobutoxy)benzene (1.00 g, 2.60 mmol), paraformaldehyde (2.45 g, 79.0 mmol) and FeCl<sub>3</sub> (0.800 g, 4.94 mmol) was stirred in dichloromethane under nitrogen atmosphere at room temperature for 8 h. The solution was evaporated under vacuo and the residue was purified by flash column chromatography on silica gel (petroleum ether/dichloromethane = 40/1, v/v) to afford **3** as a white solid (1.00 g, 32%) and [3]pseudorotaxane **4** (100 mg). Melting point of **3**: 127.7–129.6 °C. <sup>1</sup>H NMR of **3** (400 MHz, CDCl<sub>3</sub>, 295 K) δ (ppm): 6.82–6.81 (8H, m), 6.76 (2H, s), 3.89 (4H, *J* = 6.0 Hz, t), 3.86–3.73 (26H, m), 3.42 (4H, *J* = 6.5 Hz, t), 2.05–1.98 (4H, m), 1.92–1.86 (4H, m), 1.83–1.71 (16H, m), 1.08–1.00 (24H, m). <sup>13</sup>C NMR of **3** (125 MHz, CDCl<sub>3</sub>, 295 K) δ (ppm): 149.88, 149.84, 149.74, 128.54, 128.39, 128.31, 128.29, 128.01, 115.04, 70.08, 70.04, 69.96, 69.93, 67.21, 33.67, 29.70, 29.51, 28.39, 23.08, 23.04, 10.92, 10.79. LRESIMS: *m/z* 1234.4 [M + H<sub>2</sub>O + H]<sup>+</sup> (100%). HRESIMS: *m/z* calcd for [M + Na]<sup>+</sup> C<sub>67</sub>H<sub>92</sub>Br<sub>2</sub>NaO<sub>10</sub><sup>+</sup>, 1237.4949; found 1237.4938; error –0.9 ppm. <sup>1</sup>H NMR of **4** (400 MHz, CDCl<sub>3</sub>, 295 K, 8.00 mM) δ (ppm): 6.89 (16H, s), 6.84 (4H, s), 6.80 (4H, s), 3.89–3.77 (60H, m), 3.48–3.45 (8H, t), 2.04 (8H, m), 1.93 (8H, m), 1.84–1.81 (32H, m), 1.07–1.03 (48H, m). <sup>13</sup>C NMR of **4** (125 MHz, CDCl<sub>3</sub>, 295 K, 15.0 mM) δ (ppm): 148.84, 148.81, 148.67, 127.51, 127.45, 127.33, 127.26, 127.22, 127.05, 126.98, 113.89, 113.83, 69.10, 69.04, 69.03, 68.97, 68.90, 66.34, 66.27, 66.23, 66.20, 32.67, 32.65, 27.39, 22.09, 22.06, 21.90, 9.91, 9.78.

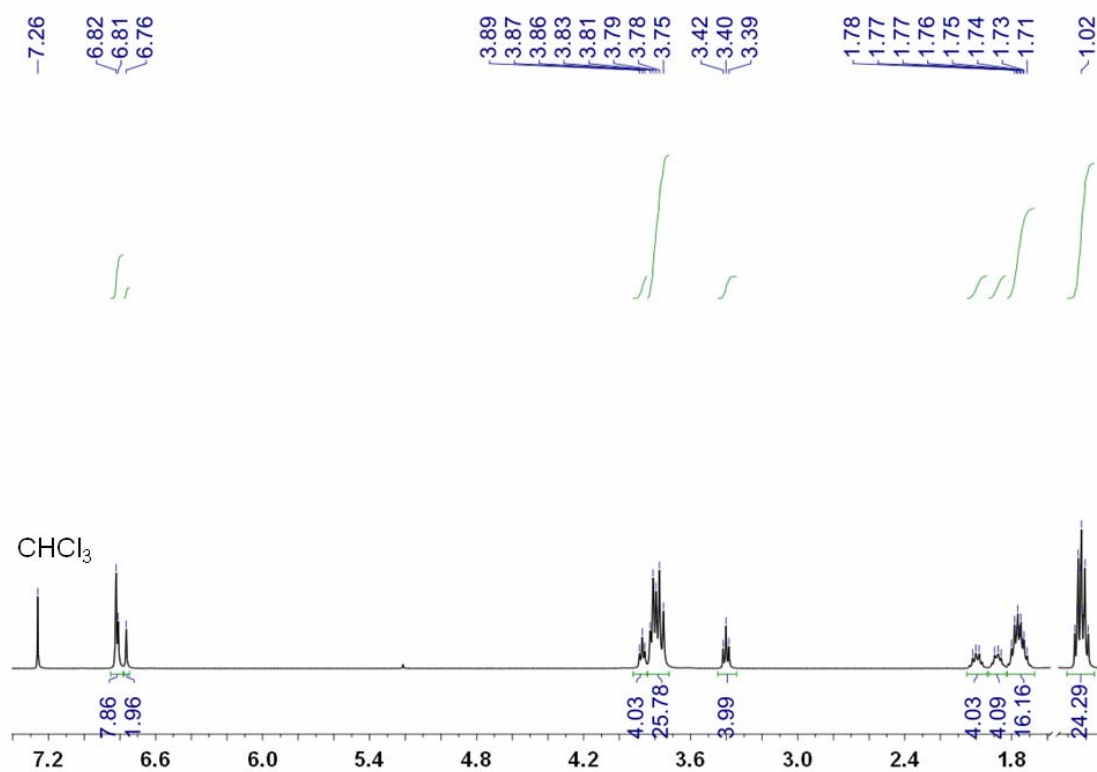

Fig. S1 <sup>1</sup>H NMR spectrum (400 MHz, chloroform-*d*, 22 °C) of **3**.

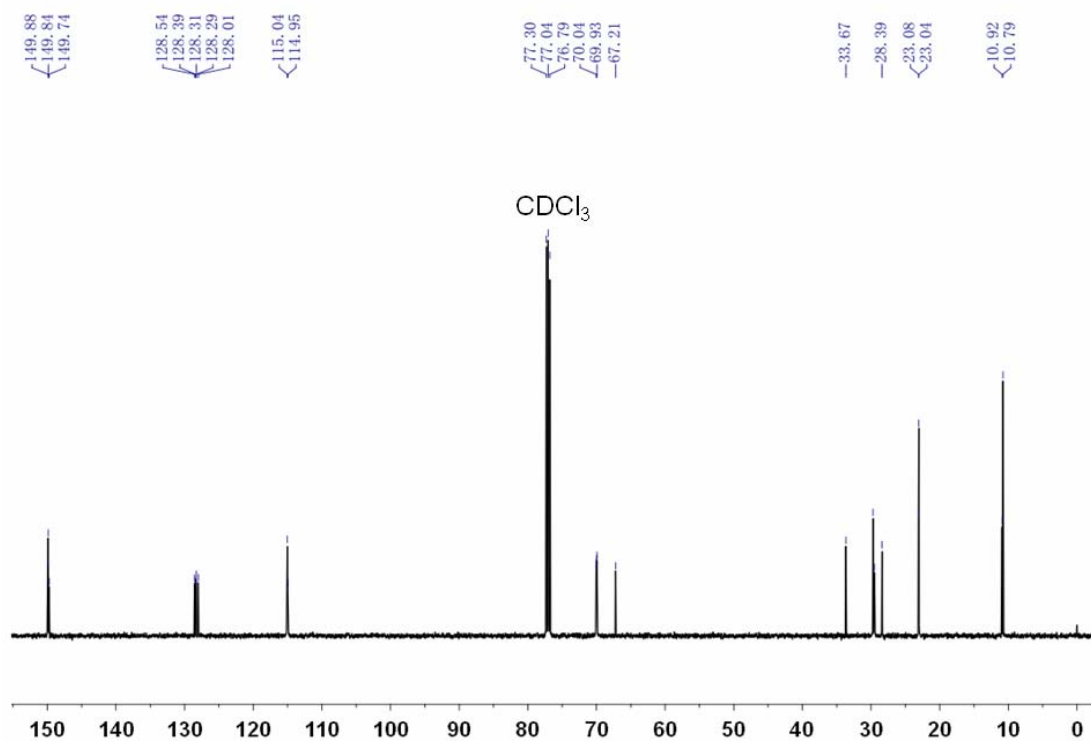

Fig. S2 <sup>13</sup>C NMR spectrum (125 MHz, chloroform-*d*, 22 °C) of **3**.

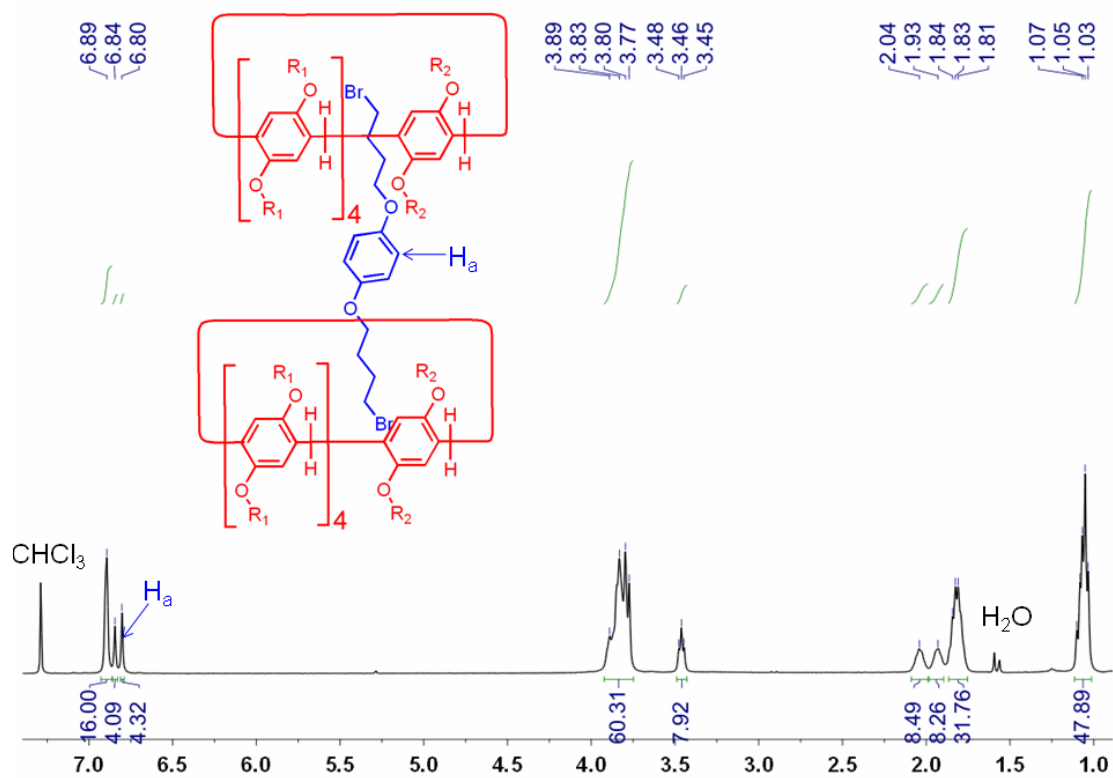

Fig. S3 <sup>1</sup>H NMR spectrum (400 MHz, chloroform-*d*, 22 °C, 8.00 mM) of 4.

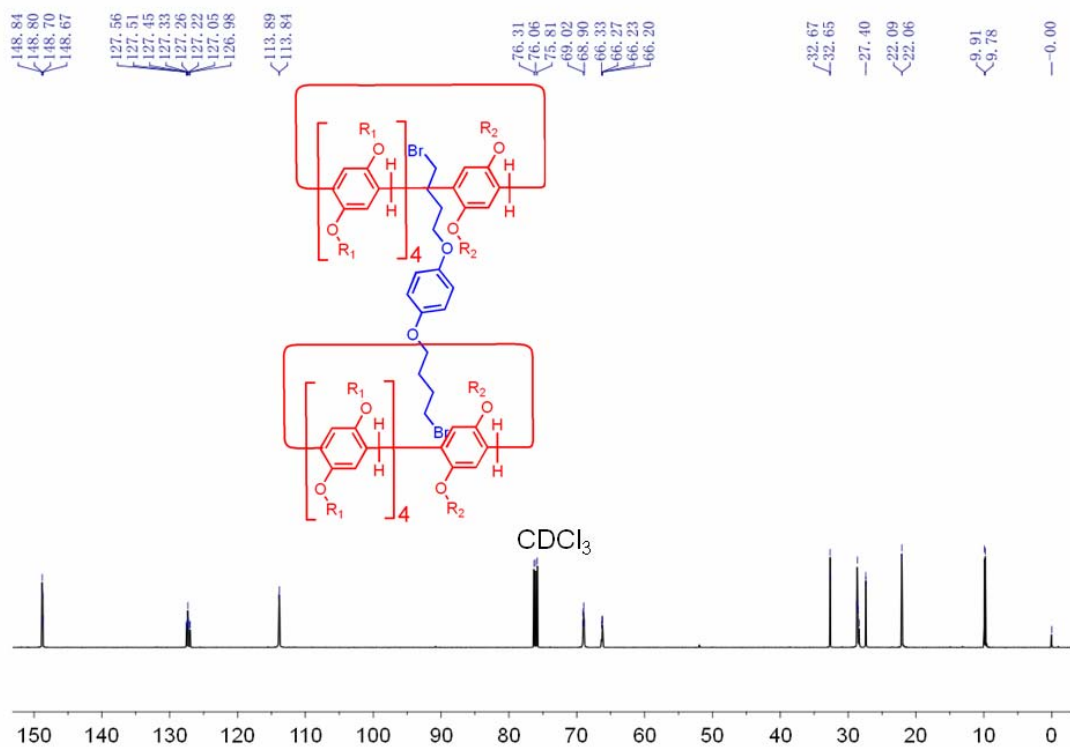

Fig. S4 <sup>13</sup>C NMR spectrum (125 MHz, chloroform-*d*, 22 °C, 15.0 mM) of 4.

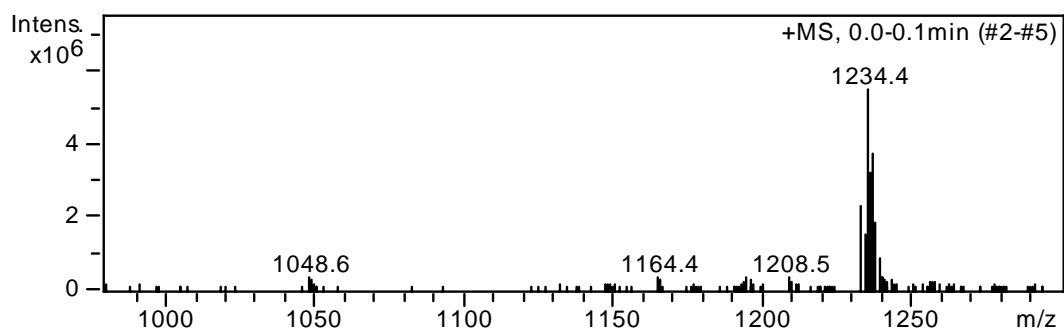

**Fig. S5** LRESI mass spectrum of **3**. Main peak:  $m/z$  1234.4  $[M + H_2O + H]^+$  (100%).

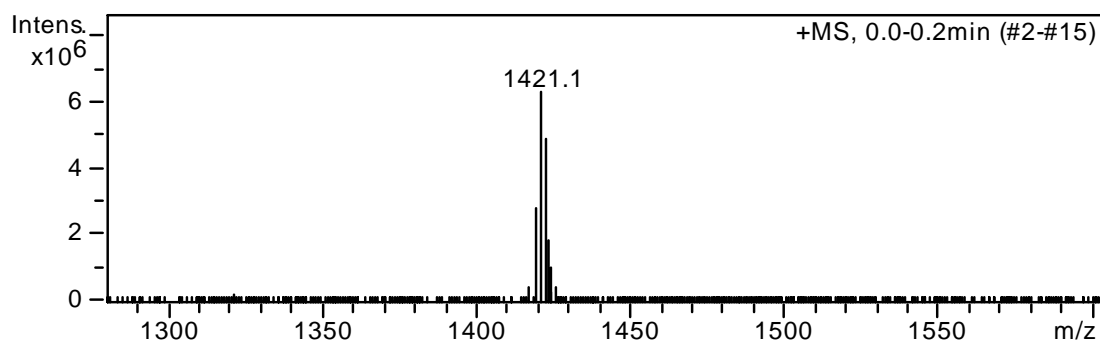

**Fig. S6** LRESI mass spectrum of a solution of **3** and **2**. Main peak:  $m/z$  1421.1  $[M + 2H_3O]^{2+}$  (100%).

3. Stoichiometry and association constant determination for the complexation  
between **3** and **2**

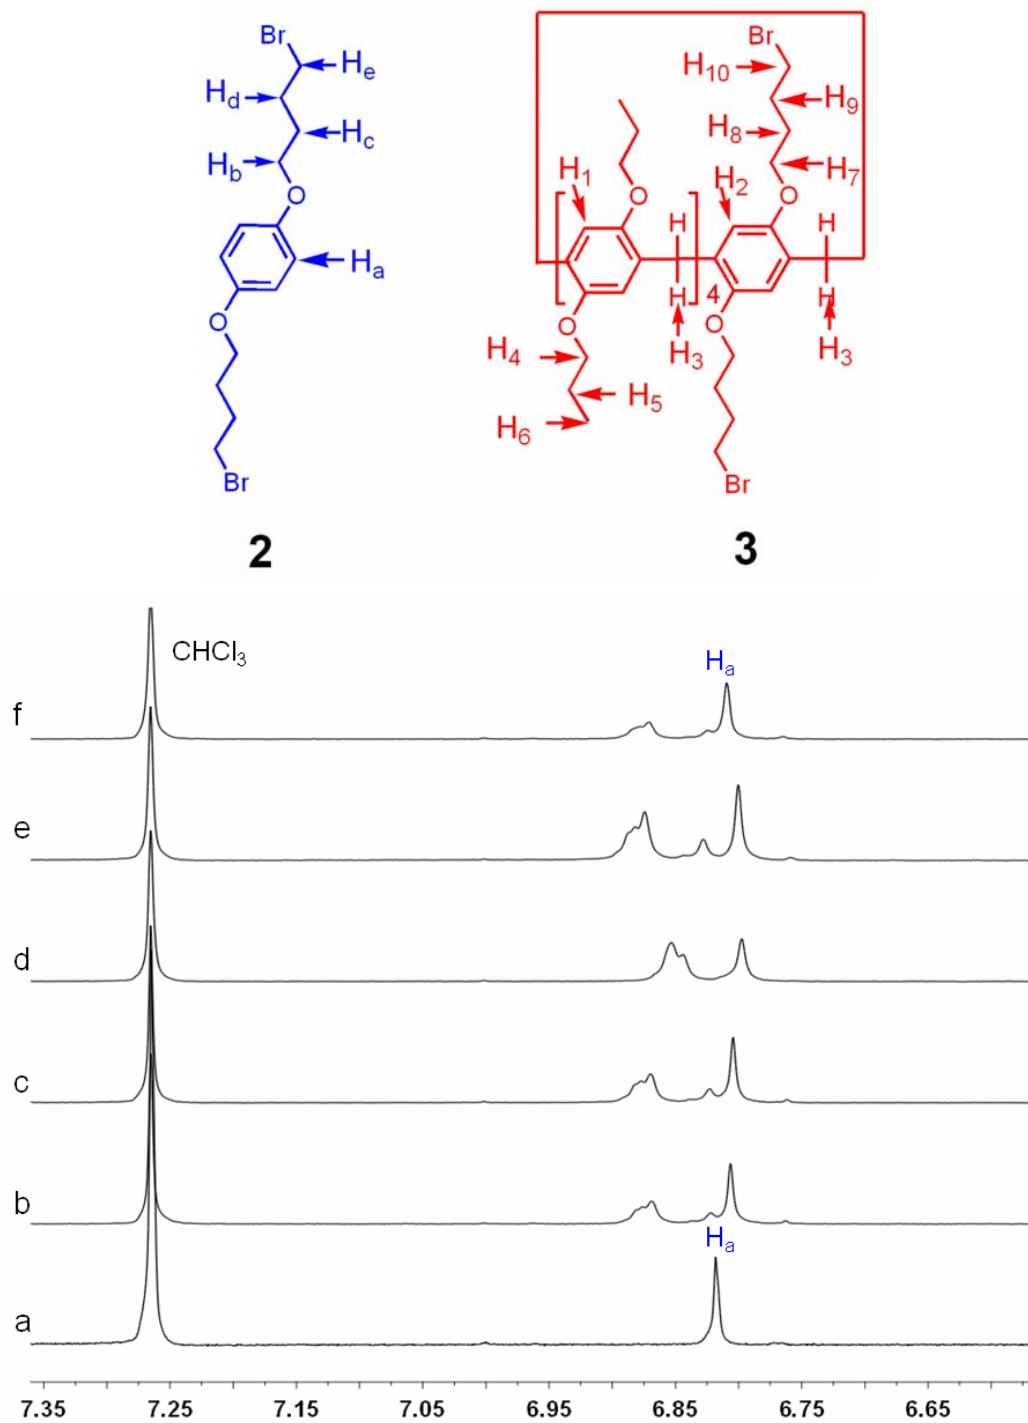

**Fig. S7** Partial <sup>1</sup>H NMR spectra (500 MHz, chloroform-*d*, 22 °C): (a) 4.00 mM **2**; (b) 1.00 mM **3** and 3.00 mM **2**; (c) 2.67 mM **3** and 1.33 mM **2**; (d) 2.00 mM **3** and 2.00 mM **2**; (e) 1.33 mM **3** and 2.67 mM **2**; (f) 3.00 mM **3** and 1.00 mM **2**.

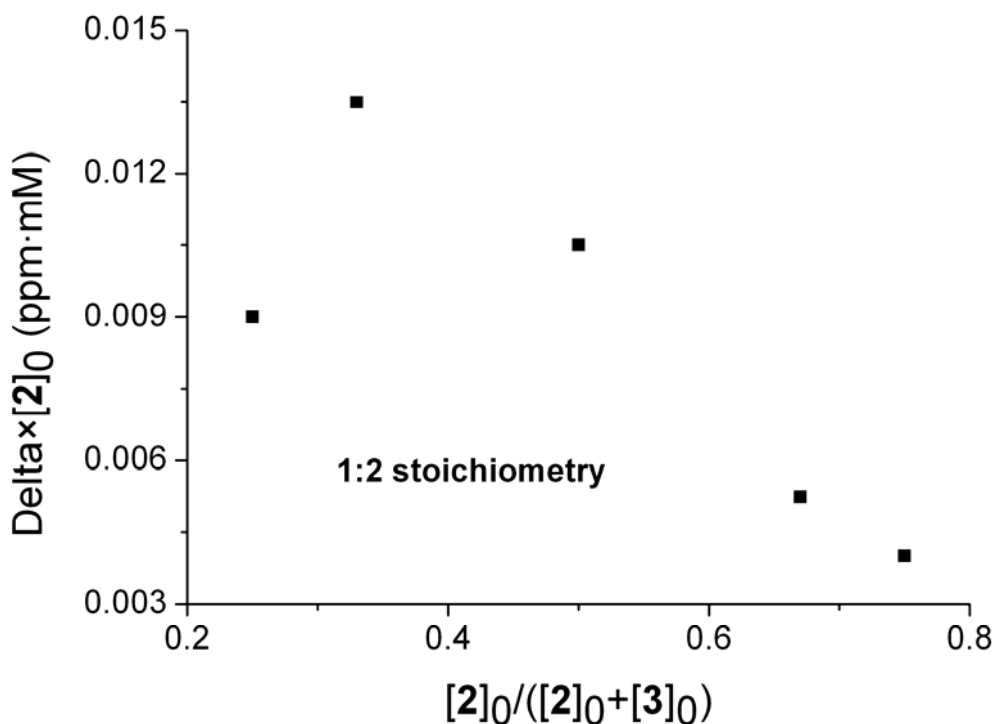

**Fig. S8** Job plot showing the 1:2 stoichiometry of the complexation between **2** and **3** in chloroform-*d* using the proton NMR data for H<sub>a</sub>. Delta is the chemical shift change of H<sub>a</sub>.  $[2]_0 + [3]_0 = 4.00$  mM.  $[2]_0$  and  $[3]_0$  are initial concentrations of **2** and **3**.

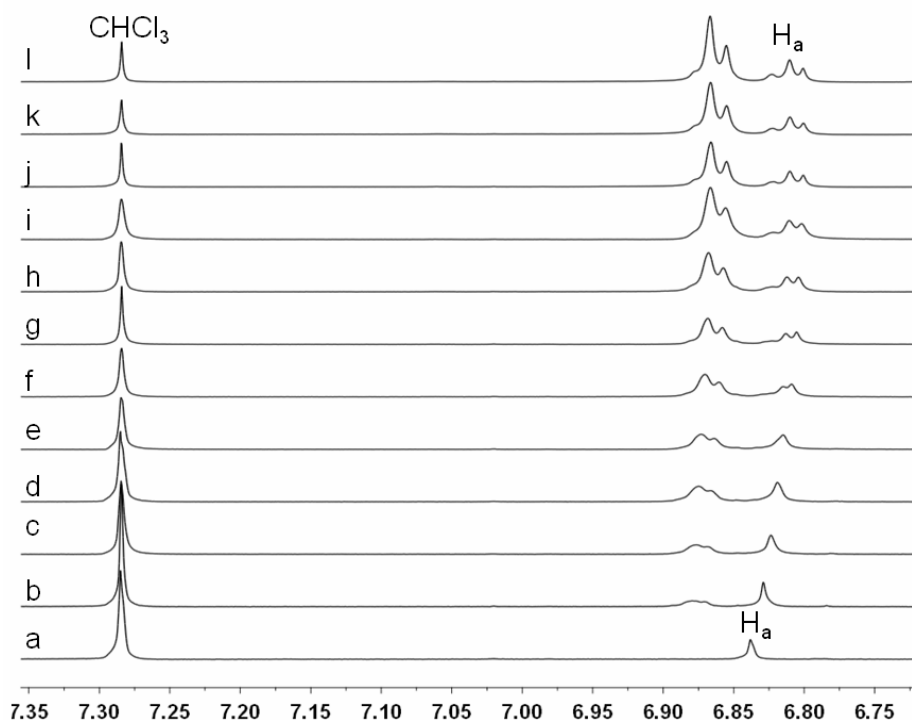

**Fig. S9** Partial <sup>1</sup>H NMR spectra (500 MHz, chloroform-*d*, 22 °C) of **2** at the concentration of 1.50 mM upon addition of **3**: (a) 0 mM; (b) 0.880 mM; (c) 1.73 mM; (d) 2.55 mM; (e) 3.33 mM; (f) 5.18 mM; (g) 6.86 mM; (h) 8.41 mM; (i) 11.2 mM; (j) 13.5 mM; (k) 17.4 mM; (l) 20.0 mM.

Treatment of chemical shifts of H<sub>a</sub> on **2** by Benesi-Hildebrand method<sup>S2</sup>

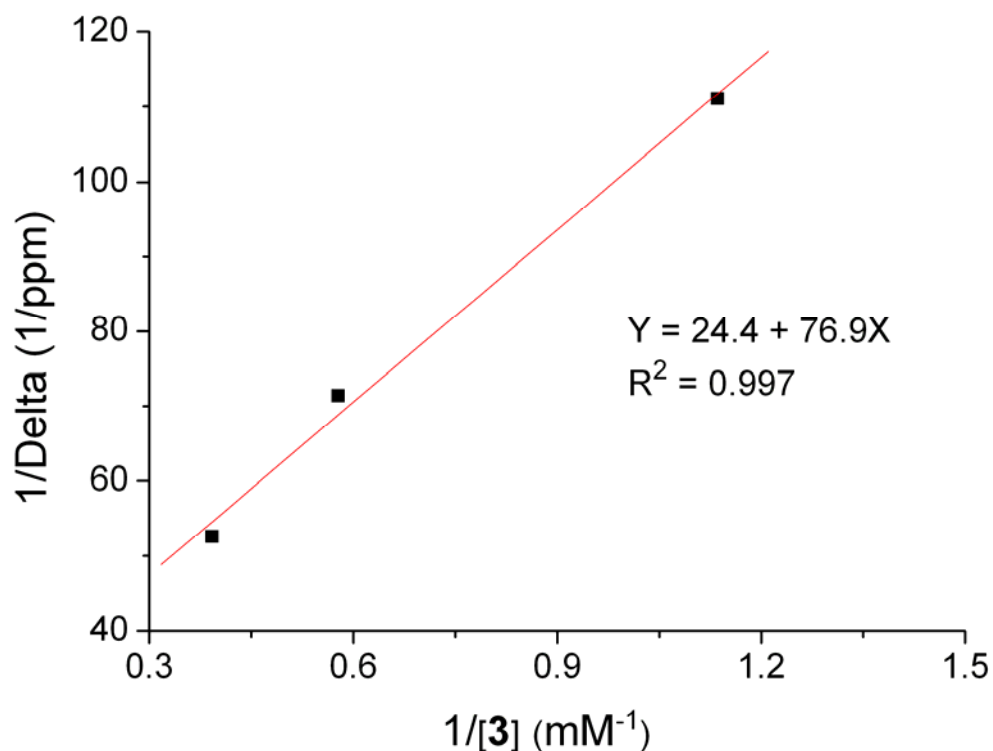

**Fig. S10** Benesi-Hildebrand plot for the complexation of host **3** with guest **2**.  $\Delta_0$ , the difference in  $\delta$  values for H<sub>a</sub> of **2** in the uncomplexed and fully complexed species, was determined as the y-intercept of a plot of  $\Delta = \delta - \delta_u$  versus  $1/[2]_0$  in the high initial concentration range of **2**.  $\Delta_0 = 1/24.4 = 0.0401$  ppm.

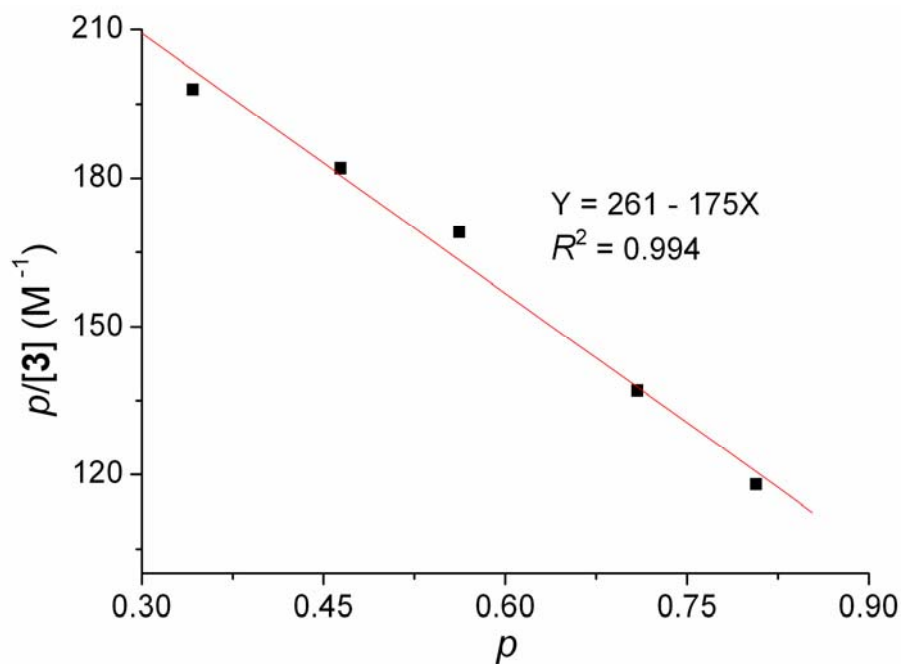

**Fig. S11** Scatchard plot for the complexation of host **3** with guest **2** in chloroform-*d* at 22 °C.  $p$  = fraction of alkyl chains unit on **2** bound. Error bars in  $p$ :  $\pm 0.03$  absolute; error bars in  $p/[3]$ :  $\pm 0.06$  relative.



4. The  $^1\text{H}$  NMR of a solution of **2** and **3** in different organic solvents

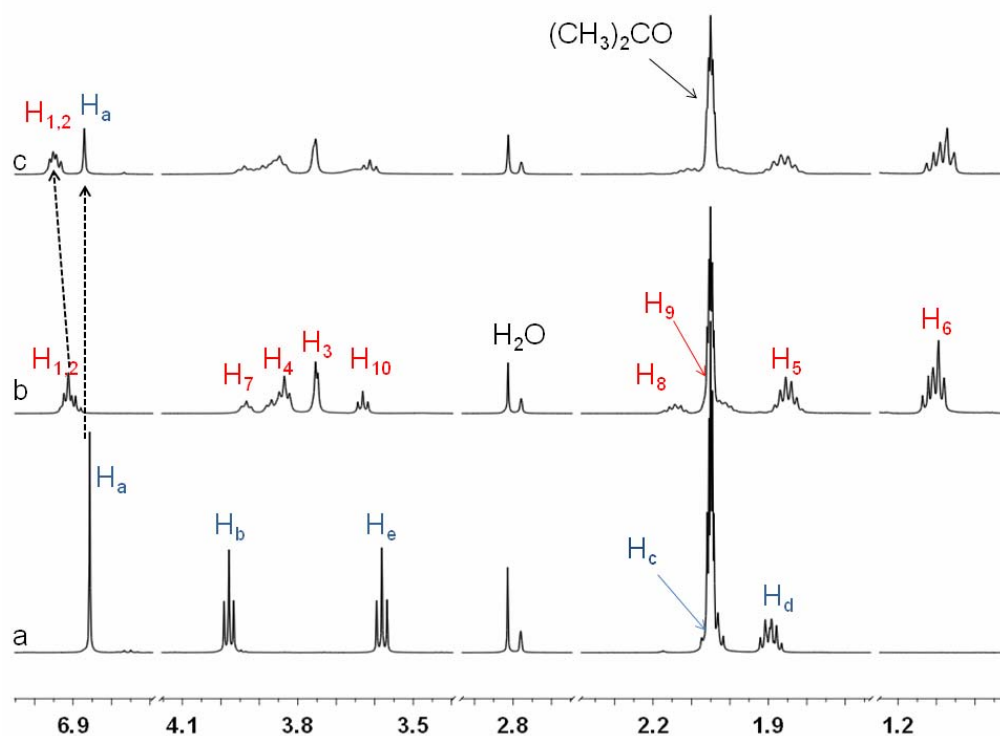

**Fig. S12** Partial  $^1\text{H}$  NMR spectra (500 MHz, acetone- $d_6$ , 22 °C): (a) 4.00 mM **2**; (b) 4.00 mM **3**; (c) 4.00 mM **3** and 2.00 mM **2**.

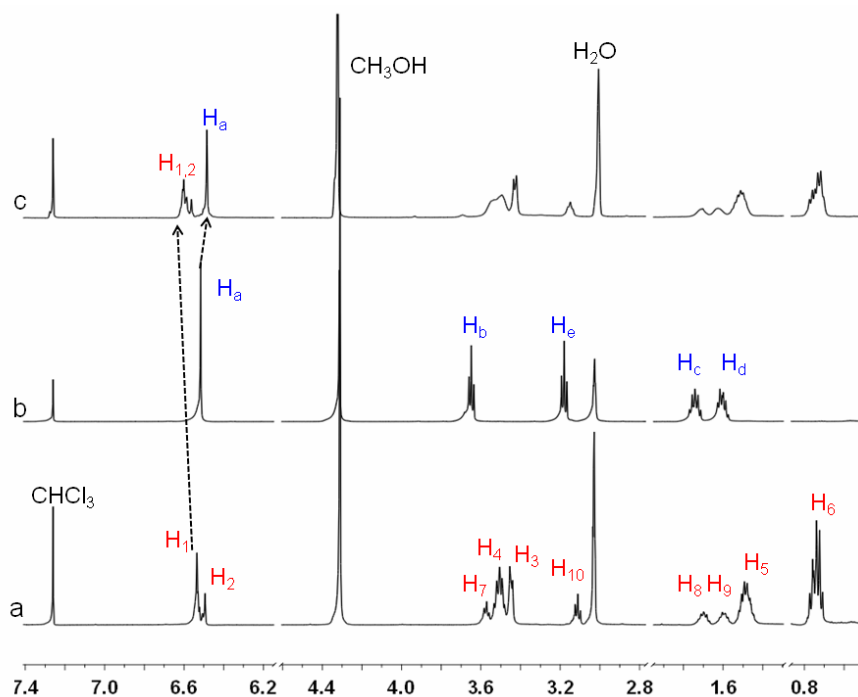

**Fig. S13** Partial  $^1\text{H}$  NMR spectra [500 MHz, methanol- $d_4$ /chloroform- $d$  (1:1, v/v), 22 °C]: (a) 4.00 mM **3**; (b) 4.00 mM **2**; (c) 4.00 mM **3** and 2.00 mM **2**.

### 5. Variable-temperature $^1\text{H}$ NMR spectra of a solution of **2** and **3** in toluene- $d_8$

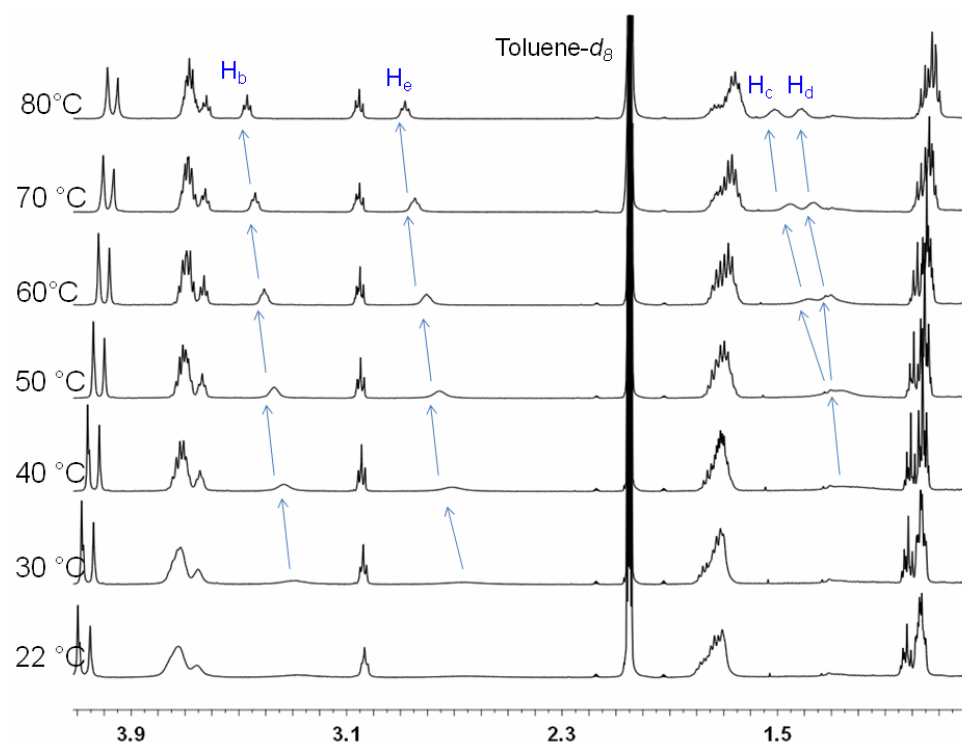

**Fig. S14** Partial variable-temperature  $^1\text{H}$  NMR spectra (500 MHz, toluene- $d_8$ ) of a solution of 4.00 mM **3** and 2.00 mM **2**.

### 6. X-ray crystal data of **4**

Crystal data of **4**: colorless,  $\text{C}_{74}\text{H}_{102}\text{Br}_3\text{O}_{11}$ ,  $FW$  1407.29, monoclinic, space group  $C2/c$ ,  $a = 32.807(3)$ ,  $b = 20.7165(10)$ ,  $c = 27.943(3)$  Å,  $\alpha = 90.00^\circ$ ,  $\beta = 130.180(17)^\circ$ ,  $\gamma = 90.00^\circ$ ,  $V = 14510(2)$  Å $^3$ ,  $Z = 8$ ,  $D_c = 1.288$  g cm $^{-3}$ ,  $T = 140(2)$  K,  $\mu = 1.724$  mm $^{-1}$ , 28619 measured reflections, 13256 independent reflections, 931 parameters, 472 restraints,  $F(000) = 5912$ ,  $R_1 = 0.1805$ ,  $wR_2 = 0.2659$  (all data),  $R_1 = 0.0843$ ,  $wR_2 = 0.2048$  [ $I > 2\sigma(I)$ ], max. residual density 0.569 e•Å $^{-3}$ , and goodness-of-fit ( $F^2$ ) = 1.004. CCDC-900315.

### References:

- S1. (a) S. A. Caldarelli, J.-F. Duckert, S. Wein, M. Calas, C. Périgaud, H. Vial and S. Peyrottes, *ChemMedChem*, 2010, **5**, 1102–1109; (b) R. Castro, K. R. Nixon, J. D. Evanseck and A. E. Kaifer, *J. Org. Chem.*, 1996, **61**, 7298–7303.
- S2. Benesi, H. A.; Hildebrand, J. H. *J. Am. Chem. Soc.*, 1949, **71**, 2703–2707.
